# Supplementary material for: Effects of Plant-Based Protein Interventions, with and without an Exercise Component, on Body Composition, Strength and Physical Function in Older Adults: A Systematic Review and Meta-Analysis of Randomized Controlled Trials
Source: MDPI journal article supplement (doi:10.3390/nu15184060), 2023-09-19
Supplement: s1 [file s1]

## Supplementary Figures

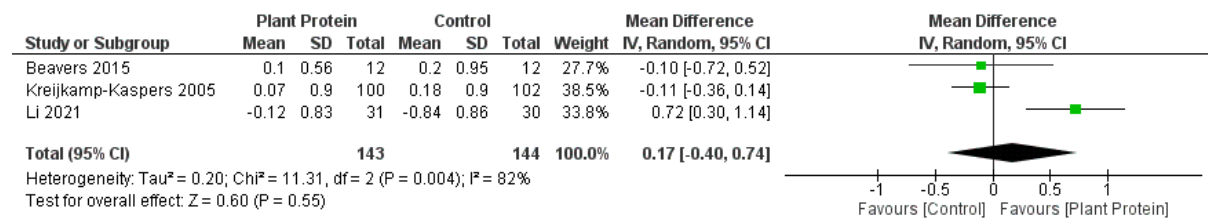

**Figure S1.** Forest plot of randomized controlled studies examining the effect of plant protein interventions on short physical performance battery (SPPB). Individual study effect estimates (green boxes) and the pooled effect estimate (diamond) are shown. Values are mean differences with 95% confidence intervals (CI) determined using generic inverse-variance random-effects models. Heterogeneity was quantified by  $I^2$  at a significance of  $p < 0.10$

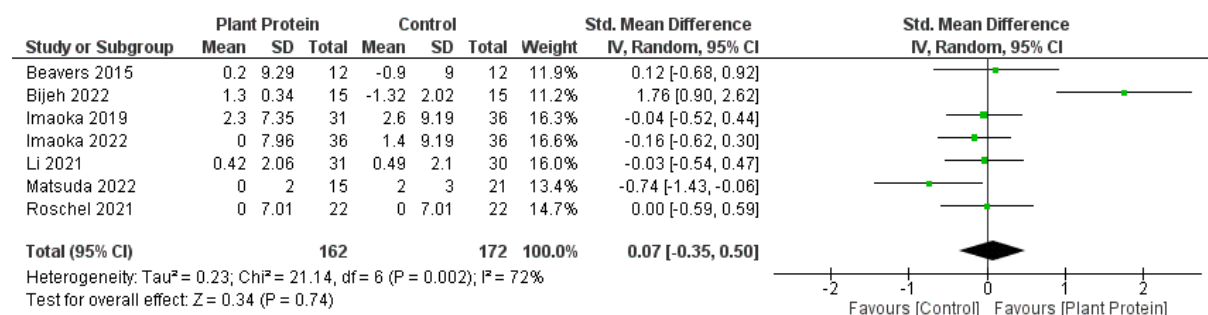

**Figure S2.** Forest plot of randomized controlled studies examining the effect of plant protein interventions on hand grip strength. Individual study effect estimates (green boxes) and the pooled effect estimate (diamond) are shown. Values are standardised mean differences with 95% confidence intervals (CI) determined using generic inverse-variance random-effects models. Heterogeneity was quantified by  $I^2$  at a significance of  $p < 0.10$

## Supplementary Tables

**Table S1. Search Strategy for Embase Database**

| Search Line | Search Terms                                                                      |
|-------------|-----------------------------------------------------------------------------------|
| 1           | SARCOPENIA/                                                                       |
| 2           | AGED/                                                                             |
| 3           | AGING/                                                                            |
| 4           | "Aged, 80 and over"/                                                              |
| 5           | FRAIL ELDERLY/                                                                    |
| 6           | FRAILITY/                                                                         |
| 7           | (dynapen* or anabolic resistance).mp.                                             |
| 8           | (older adult or older or senior or elder or elderly or ?enarian or geriatric).mp. |
| 9           | (sarcop?eni* or aged or aging or frail elderly or frailty).tw.                    |
| 10          | 1 or 2 or 3 or 4 or 5 or 6 or 7 or 8 or 9                                         |
| 11          | Plant Proteins/                                                                   |
| 12          | Vegetable Proteins/                                                               |
| 13          | Soybean Proteins/                                                                 |
| 14          | (plant protein* or vegetable protein* or soybean protein*).tw.                    |
| 15          | Soy milk/                                                                         |
| 16          | soy milk.tw.                                                                      |
| 17          | 11 or 12 or 13 or 14 or 15 or 16                                                  |
| 18          | Body Composition/                                                                 |
| 19          | Skeletal Muscle/                                                                  |
| 20          | Adipose Tissue/                                                                   |
| 21          | Bone density/                                                                     |
| 22          | (muscle or muscle mass or fat mass or bone density).mp.                           |
| 23          | 18 or 19 or 20 or 21 or 22                                                        |
| 24          | animals/ not (humans/ and animals/)                                               |
| 25          | 10 and 17 and 23                                                                  |
| 26          | 25 not 24                                                                         |

**Table S2. Search Strategy for CINAHL (Cumulative Index to Nursing and Allied Health Literature) Database**

| Search Line | Search Terms                                                                                         |
|-------------|------------------------------------------------------------------------------------------------------|
| 1           | MH sarcopenia                                                                                        |
| 2           | MH aging                                                                                             |
| 3           | MH frailty syndrome                                                                                  |
| 4           | MH frail elderly                                                                                     |
| 5           | MH aged                                                                                              |
| 6           | TI sarcop#eni* or aging or aged or frail or frail elderly or frailty                                 |
| 7           | AB sarcop#eni* or aging or aged or frail or frail elderly or frailty                                 |
| 8           | "anabolic resistance" OR dynap#eni* OR "older adult" OR senior<br>OR elder* OR ?enarian OR geriatric |
| 9           | S1 OR S2 OR S3 OR S4 OR S5 OR S6 OR S7 OR S8                                                         |
| 10          | MH plant proteins                                                                                    |
| 11          | MH soy proteins                                                                                      |
| 12          | MH soy foods                                                                                         |
| 13          | TI "plant protein*" or "soy protein*" or "soy food*" or "plant-base*" or "soy milk"                  |
| 14          | AB "plant protein*" or "soy protein*" or "soy food*" or "plant-base*" or "soy milk"                  |
| 15          | MH soy milk                                                                                          |
| 16          | S10 OR S11 OR S12 OR S13 OR S14 OR S15                                                               |
| 17          | S9 AND S16                                                                                           |

**Table S3. Search Strategy for Cochrane Library Database**

| Search Line | Search Terms                                                                |
|-------------|-----------------------------------------------------------------------------|
| 1           | sarcop*enia                                                                 |
| 2           | MeSH descriptor: [Sarcopenia] explode all trees                             |
| 3           | MeSH descriptor: [Aged] explode all trees                                   |
| 4           | MeSH descriptor: [Aged, 80 and over] explode all trees                      |
| 5           | MeSH descriptor: [Aging] explode all trees                                  |
| 6           | aged or aging                                                               |
| 7           | dynap*enia                                                                  |
| 8           | "anabolic resistance"                                                       |
| 9           | "older adult" or older or senior or elderly or *enarian or geriatric        |
| 10          | MeSH descriptor: [Frail Elderly] explode all trees                          |
| 11          | MeSH descriptor: [Frailty] explode all trees                                |
| 12          | frail or "frail elder" or "frail elderly" or frailty                        |
| 13          | #1 or #2 or #3 or #4 or #5 or #6 or #7 or #8 or #9 or #10 or #11 or #12     |
| 14          | MeSH descriptor: [Plant Proteins] explode all trees                         |
| 15          | MeSH descriptor: [Plant Proteins, Dietary] explode all trees                |
| 16          | "plant protein" or "dietary protein" or "vegetable protein" or "plant-base" |
| 17          | MeSH descriptor: [Soy Milk] explode all trees                               |
| 18          | "plant-based protein"                                                       |
| 19          | MeSH descriptor: [Soy Foods] explode all trees                              |
| 20          | MeSH descriptor: [Soybean Proteins] explode all trees                       |
| 21          | soy                                                                         |
| 22          | "soy milk" or "soy food" or "soybean protein"                               |
| 23          | #14 or #15 or #16 or #17 or #18 or #19 or #20 or #21 or #22                 |
| 24          | #13 and #23 in Trials                                                       |
